# Supplementary material
Source: publisher site journal article supplement (https://www.dovepress.com/article/278596)
Supplement: Supplementary file 1 [file get_supplementary_file.php]

**Supplementary Digital Content 1**

**Discrepancies between the British Pediatric Association’s subclassification of ICD-10 and the Danish classification of malformations**

The EUROCAT classification is based on the British Pediatric Associations subclassification of the 10th version of the International Classification of Disease (ICD-10-BPA). The BPA version has minor inconsistencies with the Danish subgroups of ICD-10 (ICD-10-DK). Lack of Danish equivalent code is marked with No Danish Code (NDC)

| **Malformation** | **ICD-10-BPA** | **ICD-10-DK** |
| --- | --- | --- |
| Cystic hygroma | D18.10 | D18.1A |
| Hydranencephaly | Q04.35 | Q04.3B |
| Single congenital cerebral cyst | Q04.61 | NDC |
| Crocodile tears | Q07.82 | NDC |
| Synophrys | Q18.80 | NDC |
| Patent or persistent foramen ovale | Q21.11 | Q21.1C |
| Persistent right aortic arch | Q25.41 | Q25.4E |
| Laryngomalacia | Q31.40 | Q31.8H |
| Single cyst of the lung | Q33.00 | NDC |
| Broncho-pulmonary isomerism | Q33.81 | NDC |
| High arched palate | Q38.50 | Q38.5B |
| Dysmotility of stomach | Q40.21 | NDC |
| Large intestinal dysmotility | Q43.20 | NDC |
| Small intestinal dysmotility | Q43.81 | NDC |
| Generalised intestinal dysmotility | Q43.82 | NDC |
| Alagille's syndrome | Q44.71 | Q44.7B |
| Congenital mesenteric cyst | Q45.83 | Q45.8B |
| Retractile testis | Q55.20 | Q55.2F |
| Bifid scrotum | Q55.21 | Q55.2B |
| Meckel-Gruber syndrome | Q61.90 | Q61.9A |
| Clinodactyly | Q68.10 | NDC |
| Congenital genu recurvatum | Q68.21 | Q68.2A |
| Accessory carpal bones | Q74.00 | Q74.0G |
| Larsen’s syndrome | Q74.84 | NDC |
| Frontonasal dysplasia | Q75.81 | NDC |
| Congenital constriction bands | Q79.80 | NDC |
| Abnormal palmar creases | Q82.80 | NDC |
| Accessory skin tags | Q82.81 | NDC |
| Cyclopia | Q87.03 | Q87.0D |
| Goldenhar syndrome | Q87.04 | Q87.0F |
| Moebius syndrome | Q87.06 | Q87.0G |
| Pierre Robin sequence | Q87.08 | Q87.0I |
| Sirenomelia syndrome | Q87.24 | Q87.2E |
| VATER association | Q87.26 | Q87.2G |
| Congenital adrenal hypoplasia | Q89.11 | NDC |

**Supplementary Digital content 2**

**List of ICD-10-DK diagnose codes used to define major malformations in accordance with EUROCATs classification of malformations**

| **Malformation group** | **Included codes**  **(incl subgroups)** | **Excluded minor malformations** |
| --- | --- | --- |
| All Major malformations | Q  D181A D215 D821  P350 P351 P371 | Q078D Q078G Q101-Q105 Q135 Q170-Q175 Q179-Q182 Q184-Q187 Q189 Q211C Q246 Q254E Q261 Q314 Q318H Q320 Q322 Q331 Q357 Q381 Q382 Q385B Q400 Q401 Q430 Q444 Q458B Q501 Q502 Q505 Q523 Q525 Q527 Q53 Q544 Q552F Q552B Q610 Q627 Q633 Q653-Q656 Q658 Q659 Q661- Q669 Q670-Q675 Q678 Q680 Q682A Q683 Q684 Q685 Q740G Q752 Q753 Q760 Q764L Q765 Q766A-Q766C Q767C Q825 Q833 Q845 Q846 Q899 Q95 |
| Nervous system | Q00-Q07 | Q078D Q078G |
| Eye | Q10-Q15 | Q101-Q103 Q105 Q135 |
| Ear, face and neck | Q16-Q18 | Q170-Q175 Q179 Q180-Q182 Q184-Q187 Q189 |
| Heart Defects (<37 weeks) | Q20-Q26 | Q211C Q246 Q254E Q261 Q250 Q256 |
| Heart Defects | Q20-Q26 | Q211C Q246 Q254E Q261 |
| Respiratory | Q300 Q32-Q34 | Q320 Q322 Q331 Q336 |
| Oro-facial clefts | Q35-Q37 | Q357 |
| Digestive system | Q38-Q45 Q790 | Q381 Q382 Q400 Q401 Q430 Q444 Q458B Q385B |
| Abdominal wall defects | Q792 Q793 Q795 |  |
| Urinary | Q60-Q64 Q794 | Q610 Q627 Q633 |
| Genital Organs | Q50-Q52 Q54-Q56 | Q501 Q502 Q505 Q523 Q525 Q527 Q552F Q544 Q552B |
| Limb | Q65-Q74 | Q653-Q656 Q658 Q659 Q661-Q669 Q670-Q678 Q680 Q683-Q685 Q682A Q740G |
|  |  |  |
| Chromosomal | Q90-Q93 Q96-Q99 | Q936 |
| Genetic syndrome, skeletal dysplasia, congenital skin disorder | D821 Q447B Q619A Q740B Q751 Q754 Q77 Q780 Q782 Q783 Q784 Q785 Q786 Q787 Q788 Q80 Q81 Q82 Q87 Q936 | Q870D Q870F Q870G Q870I Q872E Q872G |
| Teratogenic syndromes with malformations | Q86 P350 P351 P371 |  |
| Other anomalies | Q206 Q240 Q411 Q412 Q418 Q710 Q712 Q713 Q720 Q722 Q723 Q730 Q750 Q793 Q795 Q798S Q870G Q872G Q890 Q893 Q894 |  |

**Supplementary Digital content 3** Hip malformation records per 1,000 liveborn deliveries per year. Records were identified using 7 different criteria: All records includes any type of diagnose; Ultra-sound or x-ray procedures in addition to hip malformation record; Tentative records are unconfirmed diagnoses; Primary and secondary diagnoses; Primary and secondary diagnoses in addition to x-ray or ultrasound; Primary and secondary diagnoses in addition to diagnosis after 6 weeks post-partum; Primary and secondary diagnoses with more than 1 record during the first year of life.

**
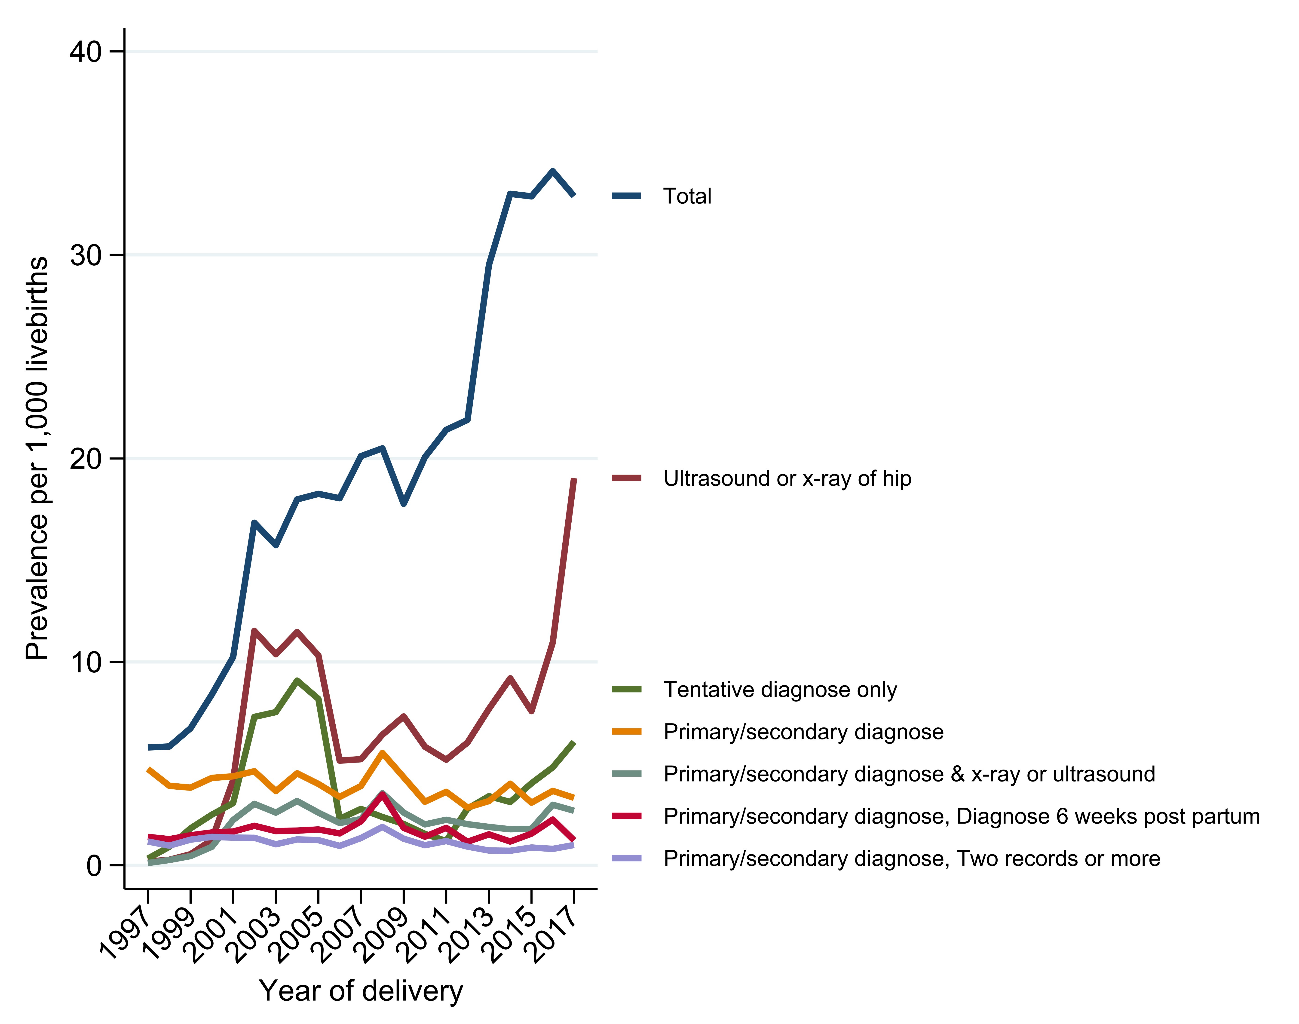
**
